# Supplementary material for: Endophytic Bacterial and Fungal Community Compositions in Different Organs of Ginseng (Panax Ginseng)
Source: Research Square preprint supplement (doi:10.21203/rs.3.rs-1131841/v1), 2021-12-13
Supplement: Supplementary file 1 [file ee1efde58a85f11690216710.docx]

| Sample name | Valid reads | Total bases | Average length (bp) | Number of ASVs |
| --- | --- | --- | --- | --- |
| Root_16S | 3,47,384 | 94,932,525 | 376.32 | 3458 |
| Stem_16S | 3,62,304 | 112,567,953 | 376.26 | 2142 |
| Leave_16S | 2,93,354 | 80,391,692 | 375.68 | 2952 |
| Root_ITS | 2,45,151 | 1,288,659 | 256.81 | 73 |
| Stem_ITS | 1,97,803 | 4,687,169 | 247.83 | 126 |
| Leave_ITS | 3,63,590 | 18,005,639 | 224.24 | 104 |

**Endophytic bacterial and fungal community composition in different organs of ginseng (*Panax ginseng*)**

**Zhenjie Fan1,2**•**Shuiming Xiao2**•**Haoyu Hu2**•**Pengfei Zhang2**•**Shuai Guo2,3**•**Dianyun Hou1***

•**Jiang Xu2***

**1College of Agriculture, Henan University of Science and Technology, Luoyang 471003, China**

**2Institute of Chinese Materia Medica, China Academy of Chinese Medical Sciences, Beijing 100700, China**

**3Pharmacy College, Chengdu University of Traditional Chinese Medicine, Chengdu 610000, China**

***email: jxu@icmm.ac.cn; dianyun518@163.com**

Supplementary Table 1Valid data statistics of different organs in ginseng.
